# Supplementary material
Source: PubMed Central journal article supplement (PMC7302769)
Supplement: mmc1.pdf [file mmc1.pdf]

# THE LANCET

## Rheumatology

### Supplementary appendix

This translation in Italian was submitted by the authors and we reproduce it as supplied. It has not been peer reviewed. *The Lancet's* editorial processes have only been applied to the original in English, which should serve as reference for this manuscript.

Questa traduzione in italiano è stata proposta dagli autori ed è riportata senza modifiche. Il testo tradotto in italiano non è stato sottoposto al processo di revisione paritaria. Il processo editoriale del *Lancet* è stato esclusivamente adottato per l'originale in inglese, che dovrebbe servire da riferimento per questo articolo.

Supplement to: Fredi M, Cavazzana I, Moschetti L, et al. COVID-19 in patients with rheumatic diseases in northern Italy: a single-centre observational and case-control study. *Lancet Rheumatol* 2020; published online June 18. [https://doi.org/10.1016/S2665-9913\(20\)30169-7](https://doi.org/10.1016/S2665-9913(20)30169-7).

## Abstract

### Background

La Lombardia è la regione italiana con il maggior numero di casi di COVID-19. Nella nostra Unità di Reumatologia e Immunologia Clinica seguiamo ambulatorialmente pazienti con malattie reumatologiche e muscoloscheletriche (RMD) residenti in un'area geografica che, fino al 10 Giugno 2020, ha registrato più di 15100 casi positivi al tampone naso-faringeo. L'obiettivo di questo lavoro è di descrivere il decorso del COVID-19 in pazienti reumatologici che vivono in una zona geografica con alta prevalenza d'infezione da SARS-CoV-2.

### Metodi

Abbiamo svolto uno studio osservazionale monocentrico raccogliendo i casi, confermati o probabili, di infezione da SARS-CoV-2 registrati nella nostra Unità Operativa di Reumatologia tra il 24 febbraio e il 1° maggio 2020.

Inoltre, abbiamo condotto uno studio caso-controllo che includeva i pazienti affetti da malattie reumatologiche ricoverati per polmonite COVID-19 presso l'Azienda Socio Sanitaria Territoriale (ASST) Spedali Civili di Brescia. I pazienti con RMD sono stati appaiati per età, sesso e mese di ricovero con almeno due controlli ricoverati con la medesima diagnosi.

### Risultati

Dal 24 febbraio al 1° maggio 2020, abbiamo valutato 1525 pazienti presso la nostra Unità Operativa mediante contatto telefonico o valutazione diretta: 117 (8%) riferivano sintomi compatibili con l'infezione da SARS-Cov-2. Sessantacinque casi sono stati confermati tramite il tampone naso-faringeo mentre 52 soggetti hanno presentato lo stesso spettro di sintomi, ma non sono stati sottoposti a tampone nasofaringeo. Confrontando i casi confermati con i casi possibili di COVID-19 nei pazienti con RMD, i primi erano più anziani (età mediana 68 [IQR 55–76] vs 57 [IQR 59–67] anni,  $p:0.0010$ ) e presentavano più frequentemente ipertensione arteriosa (n.33; 51% vs n.14; 27% OR 2.8 95% CI [1.3-6.1];  $p: 0.031$ ), e obesità (n.11; 17% vs n.1; 2%, OR 11, CI 95% [1.3-83.4];  $p:0.0059$ ). Non sono state riscontrate differenze riguardanti la diagnosi di malattia reumatologica né la terapia di base. Quarantasette pazienti (72%) con RMD hanno sviluppato una polmonite COVID-19 che ha richiesto il ricovero. Al 1° maggio, abbiamo registrato dodici decessi (10%) tra tutti i pazienti, confermati o sospetti. I pazienti deceduti con infezione COVID-19 confermata (10 casi) erano più anziani dei sopravvissuti (55 pazienti) (età mediana di 78.8 [IQR 75.3–81.3] vs 65.5 years [53.3–74.0];  $p:0.0002$ ). Non sono state riscontrate differenze di genere, comorbilità o terapie in atto.

Lo studio caso-controllo ha incluso 26 pazienti con RMD e 62 controlli ricoverati nel nostro ospedale, durante il periodo di studio, per polmonite COVID-19. Non sono state riscontrate differenze significative nella durata dei sintomi prima del ricovero, nel decorso del ricovero né nello score radiografico utilizzato a Brescia per valutare l'estensione della polmonite. Per le manifestazioni respiratorie e il coinvolgimento polmonare grave sono stati utilizzati glucocorticoidi e/o tocilizumab rispettivamente in 17 (65%) e 6 (23%) casi; in 4 (15%) pazienti con RMD si sono verificati eventi trombotici. Sono deceduti quattro pazienti con RMD (15%) e 6 controlli (10%).

#### Conclusione

Nella nostra coorte di pazienti, residenti in una regione geografica con alta prevalenza di COVID-19, un outcome sfavorevole sembra essere maggiormente associato all'età avanzata e alla presenza di comorbidità piuttosto che al tipo di malattia reumatica e/o al grado di immunosoppressione farmacologica.
