# Supplementary material
Source: PubMed Central journal article supplement (PMC7302769)
Supplement: mmc2.pdf [file mmc2.pdf]

# THE LANCET

## Rheumatology

### Supplementary appendix

This appendix formed part of the original submission and has been peer reviewed.  
We post it as supplied by the authors.

Supplement to: Fredi M, Cavazzana I, Moschetti L, et al. COVID-19 in patients with rheumatic diseases in northern Italy: a single-centre observational and case-control study. *Lancet Rheumatol* 2020; published online June 18. [https://doi.org/10.1016/S2665-9913\(20\)30169-7](https://doi.org/10.1016/S2665-9913(20)30169-7).

Appendix 1: Comparison between 47 COVID-19 positive patients admitted to hospital and 18 COVID-19 not hospitalized

|                                          | <b>COVID-19<br/>Admitted to<br/>hospital (n=47)</b> | <b>COVID-19<br/>Not hospitalized<br/>(n=18)</b> | <b>P value, OR<br/>(95%CI)</b> |
|------------------------------------------|-----------------------------------------------------|-------------------------------------------------|--------------------------------|
| Current age                              | 70 (60.5-76.0)                                      | 54 (47.0-73.8)                                  | 0.036                          |
| Gender                                   | 29 (62) M<br>18 (38) F                              | 12 (67) M<br>6 (33) F                           | 0.71                           |
| <b>Rheumatological Diagnosis, n (%)</b>  |                                                     |                                                 |                                |
| Rheumatoid Arthritis                     | 16 (34)                                             | 8 (44)                                          | 0.43                           |
| Spondyloarthritis/Psoriatic Arthritis    | 7 (15)                                              | 3 (17)                                          | 1                              |
| Adult Onset Still's disease              | 3 (6)                                               | 0                                               | 0.55                           |
| Polymyalgia Rheumatica                   | 3 (6)                                               | 1 (6)                                           | 1                              |
| Systemic Sclerosis                       | 3 (6)                                               | 1 (6)                                           | 1                              |
| SLE (with or without APS)                | 3 (6)                                               | 3 (17)                                          | 0.33                           |
| Giant Cell Arteritis                     | 2 (4)                                               | 0                                               | 1                              |
| Other vasculitis *                       | 8 (17)                                              | 0                                               | 0.09                           |
| Other **                                 | 2 (4)                                               | 3 (17)                                          | 0.12                           |
| <b>Rheumatological treatment, n (%)</b>  |                                                     |                                                 |                                |
| Glucocorticoids                          | 31 (66)                                             | 12 (67)                                         | 0.95                           |
| Weekly dosage glucocorticoids (mg)       | 35 (25-50)                                          | 35 (21.3-35)                                    | 0.34                           |
| Colchicine                               | 1 (2)                                               | 0                                               | 1                              |
| Conventional Synthetic DMARDs (csDMARDs) | 28 (60)                                             | 12 (67)                                         | 0.59                           |
| Methotrexate                             | 19 (40)                                             | 5 (28)                                          | 0.34                           |
| Hydroxychloroquine                       | 5 (11)                                              | 5 (28)                                          | 0.12                           |
| Leflunomide                              | 2 (4)                                               | 1 (6)                                           | 1                              |
| Azathioprine                             | 1 (2)                                               | 1 (6)                                           | 0.48                           |
| Cyclosporine                             | 1 (2)                                               | 1 (6)                                           | 0.48                           |
| Mycophenolate Mofetil                    | 2 (4)                                               | 0                                               | 1                              |
| Sulfasalazine                            | 0                                                   | 1 (6)                                           | 0.27                           |
| Biological DMARDs (bDMARDs)              | 18 (38)                                             | 9 (50)                                          | 0.39                           |
| Infliximab                               | 1 (2)                                               | 1 (6)                                           | 0.48                           |
| Etanercept                               | 2 (4)                                               | 1 (6)                                           | 1                              |
| Adalimumab                               | 7 (15)                                              | 1 (6)                                           | 0.42                           |
| Certolizumab pegol                       | 1 (2)                                               | 1 (6)                                           | 0.48                           |
| Tocilizumab                              | 1 (2)                                               | 2 (11)                                          | 0.18                           |
| Secukinumab                              | 1 (2)                                               | 0                                               | 1                              |
| Anakinra                                 | 1 (2)                                               | 0                                               | 1                              |
| Belimumab                                | 0                                                   | 1 (6)                                           | 0.27                           |
| Abatacept                                | 1 (2)                                               | 2 (11)                                          | 0.18                           |
| Previous/ongoing Rituximab               | 4 (9)                                               | 0                                               | 0.56                           |
| Apremilast                               | 1 (2)                                               | 0                                               | 1                              |
| csDMARD+bDMARD                           | 7 (15)                                              | 6 (33)                                          | 0.16                           |
| <b>Comorbidities, n (%)</b>              |                                                     |                                                 |                                |
| Arterial Hypertension                    | 27 (57)                                             | 6 (33)                                          | 0.082                          |
| Cardiovascular disease                   | 5 (11)                                              | 3 (17)                                          | 0.67                           |

|                                  |         |        |       |
|----------------------------------|---------|--------|-------|
| Obesity (BMI>30)                 | 10 (21) | 1 (6)  | 0·26  |
| Diabetes                         | 8 (17)  | 1 (6)  | 0·42  |
| Lung Disease***                  | 7 (15)  | 0      | 0·17  |
| Chronic Renal Insufficiency/ESRD | 3 (6)   | 1 (6)  | 1     |
| Cancer                           | 0       | 2 (11) | 0·074 |

Data are expressed as median (1st Quartile-3rd Quartile) or n (%). \*Other vasculitis (i.e. Behçet Disease, polyarteritis nodosa, Takayasu's arteritis, eosinophilic granulomatosis with polyangiitis, cryoglobulinemia, Birdshot chorioretinopathy, other vasculitis), \*\*Other (i.e. immune mediated myopathies, Sjögren's Syndrome, undifferentiated connective tissue disease, immunodeficiencies), \*\*\*Lung disease= asthma, chronic obstructive pulmonary disease, interstitial lung disease. Abbreviations: APS= antiphospholipid antibody syndrome; DMARDs= disease-modifying antirheumatic drugs; ESRD= end stage renal disorder; SLE= systemic lupus erythematosus.
